# Supplementary material for: “One-for-all” on-demand multifunctional fluorescent amphoteric polymers achieving breakthrough leather eco-manufacturing evolution
Source: Royal Society of Chemistry journal article supplement (doi:10.1039/d4gc04416a), 2024-11-21
Supplement: d4gc04416a1.pdf [file d4gc04416a1.pdf]

## Supplementary information

### S1 Synthesis of three primary colored amphoteric polymers

#### (1) Synthesis of red amphoteric polymer (AAD-R)

Firstly, 20 g of AAD was dissolved in 80 mL of deionized water. To activate the reaction system, 2.3 g of EDC (12 mmol) and 0.7 g of NHS (6 mmol) were added with slow stirring for 30 minutes. Then, 2 g of activated Red 180 (5.4 mmol) was introduced, and the reaction mixture was heated to 70°C for 24 hours. The reaction mixture was recrystallized in acetone three times, and the resulting precipitate was collected and dried in a vacuum oven at 60°C for 24 hours. The final product, a red powder named AAD-R, was obtained with a yield of 92.6%.

#### (2) Synthesis of blue amphoteric polymer (AAD-B)

In a similar procedure, 20 g of AAD was dissolved in 80 mL of deionized water. Then, 0.95 g of EDC (8 mmol) and 0.46 g of NHS (4 mmol) were added and stirred slowly for 30 minutes to activate the reaction system. Subsequently, 2 g of activated Blue 19 (3.3 mmol) was added. The reaction conditions and purification methods were identical to those used for AAD-R. The final product, a blue powder named AAD-B, was obtained with a yield of 90.3%.

#### (3) Synthesis of yellow amphoteric polymer (AAD-Y)

For the yellow polymer, 20 g of AAD was dissolved in 80 mL of anhydrous ethanol. To activate the reaction system, 2.6 g of EDC (22 mmol) and 1.3 g of NHS (11 mmol) were added with slow stirring for 30 minutes. Then, 3 g of naphthylimide derivatives (DMENA, 10.6 mmol) was added. The reaction conditions and purification process followed the same protocol as used for AAD-R. The final product, a yellow powder named AAD-Y, was obtained with a yield of 91.5%.

Based on the three primary colored amphoteric polymers (AAD-R, AAD-B, and AAD-Y), integrated amphoteric polymers with various colors were prepared: Orange

(AAD-O): Mixing AAD-R and AAD-Y in a ratio of 1:3 yielded the orange amphoteric material named AAD-O; Green (AAD-G): Mixing AAD-Y and AAD-B in a ratio of 1:3 yielded the green amphoteric material named AAD-G. Cyan (AAD-C): Mixing AAD-Y and AAD-B in a ratio of 3:1 yielded the cyan amphoteric material named AAD-C. Purple (AAD-P): Mixing AAD-R and AAD-B in a ratio of 1:1 yielded the purple amphoteric material named AAD-P.

AAD, AAD-R, AAD-O, AAD-Y, AAD-G, AAD-C, AAD-B, AAD-P are collectively referred to as AADs.

#### **(4) The application of AADs in leather manufacturing**

The AADs were utilized in the tanning-wet finishing processes of pickled sheepskins (Tab. S1). These were compared with samples of leathers tanned and wet finished using commercial chrome-free tanning agents, specifically AT, F-90, and TWS (Tab. S2-S5). To minimize errors due to variations in different parts of the leather, all samples were taken symmetrically along the dorsal spine of the same pickled sheepskin. Additionally, waste liquids from each process were collected during the experiment for subsequent environmental data analysis.

#### **(5) Production of anti-counterfeiting patterns**

To produce anti-counterfeiting patterns, the integrated material is mixed with either a temperature-sensitive dye or a light-sensitive dye in a 1:1 ratio. The anti-counterfeiting patterns, shaped like “ginkgo biloba leaves” and “clovers”, are created using a vacuum filtration device. The leather specimen was placed with the flesh side upwards, and the mould was placed on the top of the leather specimen, the mixed dyes are added slowly into the mould, and the vacuum is drawn for 1 minute, then the leather specimen is placed in the oven for 10 minutes at 60°C. Additional patterns such as “SUST”, barcodes, and QR codes were created by brushing the mixed dyes onto the leather surface.

Tab. S1 The tanning-wet finishing process of integration amphoteric polymers

| Process                               | Chemicals                      | Offer/% | T/°C | t/min | Remarks                                                                           |
|---------------------------------------|--------------------------------|---------|------|-------|-----------------------------------------------------------------------------------|
| <b>Rewetting</b>                      | Water                          | 150     | 25   | 20    | Drain                                                                             |
|                                       | Sodium chloride                | 7       |      |       |                                                                                   |
| <b>Tanning-<br/>Wet<br/>finishing</b> | Water                          | 50      | 25   | 300   | Adjust the pH of the bath liquid to 6.5 ±                                         |
|                                       | Sodium chloride                | 3       |      |       |                                                                                   |
|                                       | Triethylamine<br>“Integration” | 0.5     |      |       |                                                                                   |
|                                       | amphoteric<br>polymers         | 12      | 40   | 180   | Slowly adjust pH of the bath liquid to 8.5 ± and stop mechanical action overnight |
|                                       | Sodium bicarbonate             | 5       |      |       |                                                                                   |

Tab. S2 Tanning process of AT tanning agents

| Process      | Chemicals        | Offer/% | T/°C | t/min | Remarks                                                                                                         |
|--------------|------------------|---------|------|-------|-----------------------------------------------------------------------------------------------------------------|
| Basification | Water            | 200     | 30   | 120   | Sodium carbonate was added twice at an interval of 15 min. The pH of the system was stable at 8.5 ~ 9.0. Drain. |
|              | Sodium chloride  | 10      |      |       |                                                                                                                 |
|              | Sodium carbonate | 0.2     |      |       |                                                                                                                 |
| Tanning      | Water            | 100     | 25   | 360   | pH=8.5~9.0                                                                                                      |
|              | AT               | 6       |      |       |                                                                                                                 |
|              | Water            | 100     | 45   | 120   | Stop the drum overnight, turn 60 min the next day, remove the drum and stand still.                             |

Tab. S3 Tanning process of F-90 tanning agents

| Process           | Chemicals          | Offer/% | T/°C | t/min   | Remarks          |
|-------------------|--------------------|---------|------|---------|------------------|
| <b>Depickling</b> | Water              | 150     | 25   | 3×15+20 | Adjust pH to 7.0 |
|                   | Sodium bicarbonate | 0.2     |      |         |                  |
| <b>Tanning</b>    | Sodium chloride    | 10      | 35   | 90      | Drain water.     |
|                   | F-90               | 10      |      |         |                  |
|                   | Water              | 40      |      |         |                  |

|       |    |    |     |
|-------|----|----|-----|
| Water | 30 | 40 | 150 |
| Water | 30 | 45 | 180 |

Tab. S4 Tanning process of TWS tanning agents

| Process           | Chemicals          | Offer/% | T/°C | t/min   | Remarks                        |
|-------------------|--------------------|---------|------|---------|--------------------------------|
| <b>Depickling</b> | Water              | 150     |      |         | Adjust pH to 5.5.              |
|                   | Sodium bicarbonate | 0.2     | 25   | 3×15+20 |                                |
|                   | Sodium chloride    | 10      |      |         |                                |
| <b>Tanning</b>    | Water              | 200     | 25   | 300     | Adjust pH to 8.0. Drain water. |
|                   | TWS                | 10      |      |         |                                |
|                   | Sodium bicarbonate | 1.0     | 40   | 180     |                                |

Tab. S5 Wet finishing process of AT, F-90 and TWS tanned leather

| Process             | Chemicals                         | Offer/% | T/°C | t/min   | Remarks                        |
|---------------------|-----------------------------------|---------|------|---------|--------------------------------|
| <b>Rewetting</b>    | Water                             | 150     | 40   | 60      | Drain water                    |
|                     | Degreasing agent                  | 1       |      |         |                                |
| <b>Washing</b>      | Water                             | 250     | 37   | 15      |                                |
|                     | Water                             | 100     |      |         |                                |
| <b>Neutralizing</b> | Sodium bicarbonate                | 1       | 40   | 3×15+30 | Adjust pH to 5.5 or 7.5.       |
|                     | Formic acid                       | 0.2     |      |         |                                |
| <b>Fatliquoring</b> | Water                             | 150     | 45   | 60      |                                |
|                     | Anionic fatliquor                 | 18      |      |         |                                |
|                     | Water                             | 150     |      |         |                                |
| <b>Dyeing</b>       | Anionic dyes (TRUPOCOR YELLOW BB) | 2       | 45   | 60      |                                |
|                     | Formic acid                       | 0.2     |      |         |                                |
|                     |                                   |         |      |         |                                |
|                     | Formic acid                       | 0.2     |      | 3×15+30 | Adjust pH to 3.5. Drain water. |

## S2 LCA impacts of the AADs compare to SACG and EHBPs

The life cycle inventory (LCI) data of the upstream production of chemicals, electricity, steam, and water were collected from the Ecoinvent database and literature. The LCI data for SACG and EHBPs were estimated based on the literature *J. Clean. Prod.*, 2020, 270: 122351 and *Green Chem.*, 2021, 23, 5924.

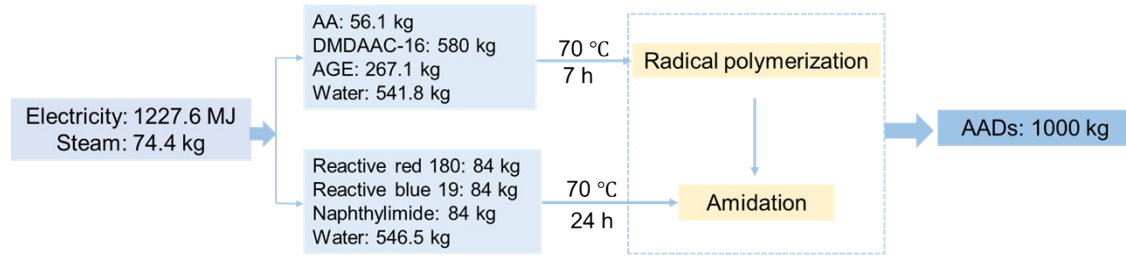

Fig. S1 Flow sheet of AADs preparation process.

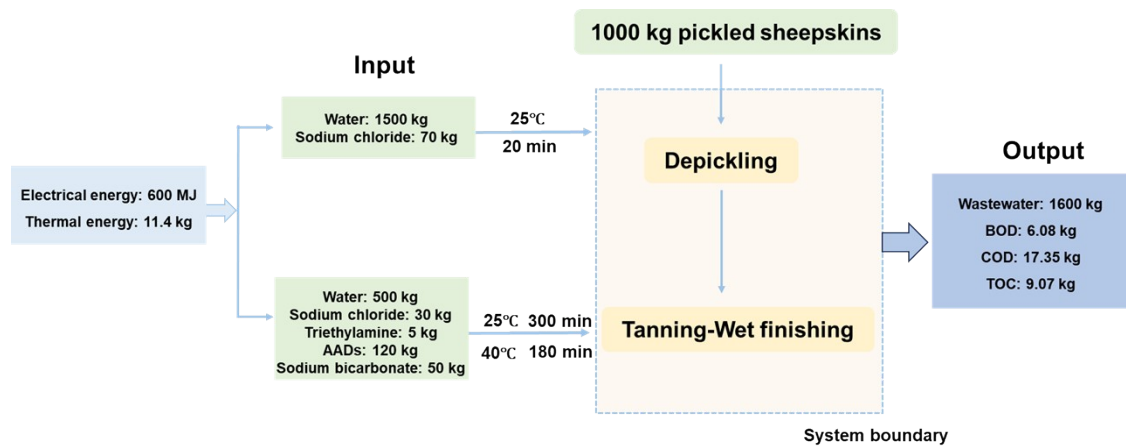

Fig. S2 Flow sheet of AADs tanning-wet finishing system.

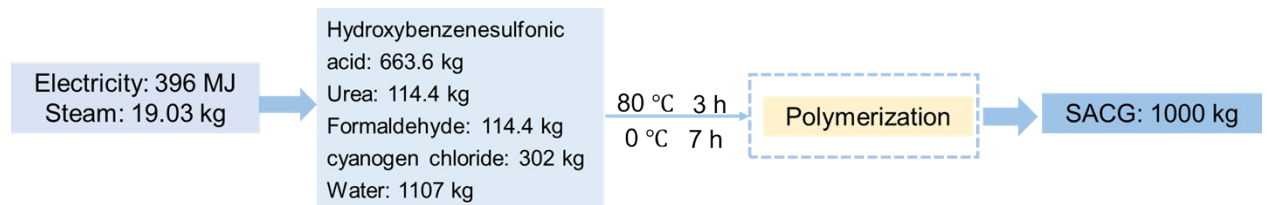

Fig. S3 Flow sheet of SACG preparation process <sup>1</sup>.

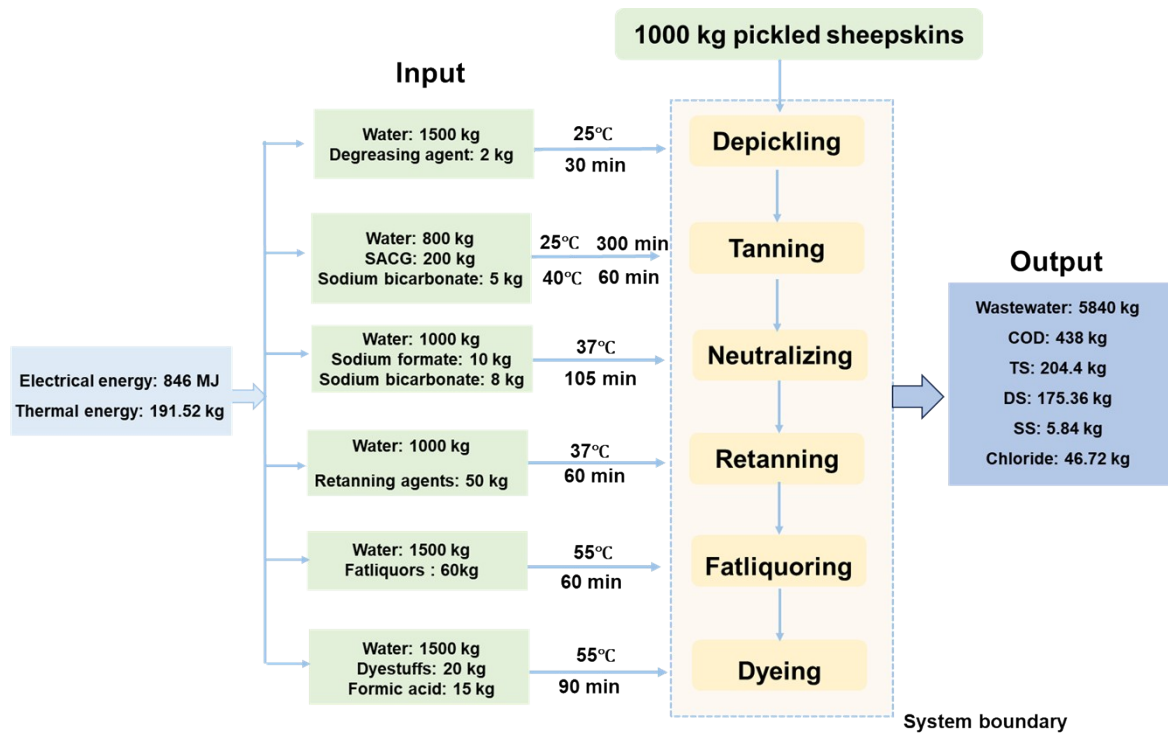

Fig. S4 Flow sheet of SACG tanning and wet-finishing system <sup>1</sup>.

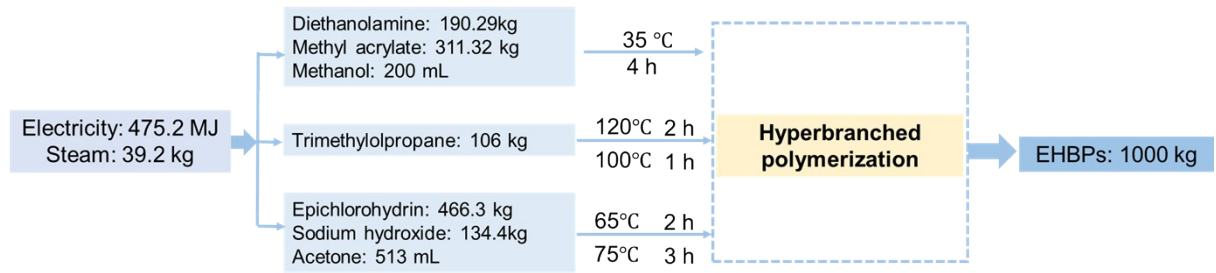

Fig. S5 Flow sheet of EHBPs preparation process <sup>2</sup>.

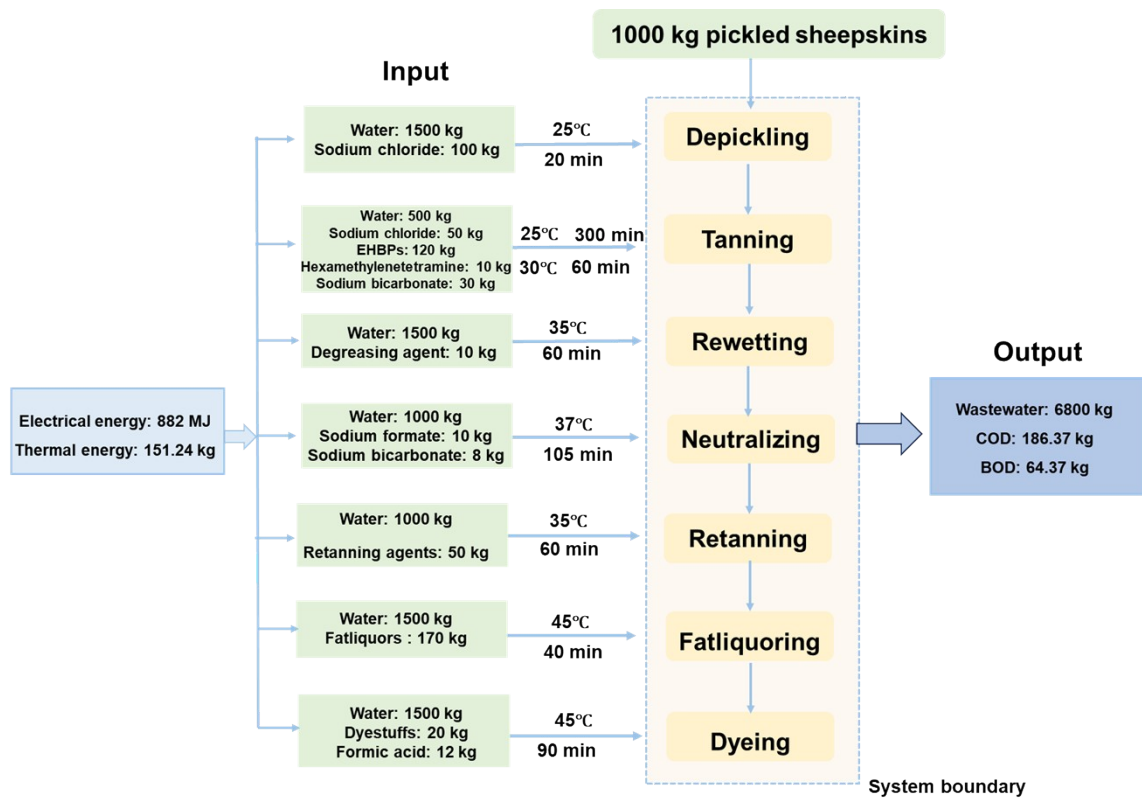

Fig. S6 Flow sheet of EHBPs tanning and wet-finishing system <sup>2</sup>.

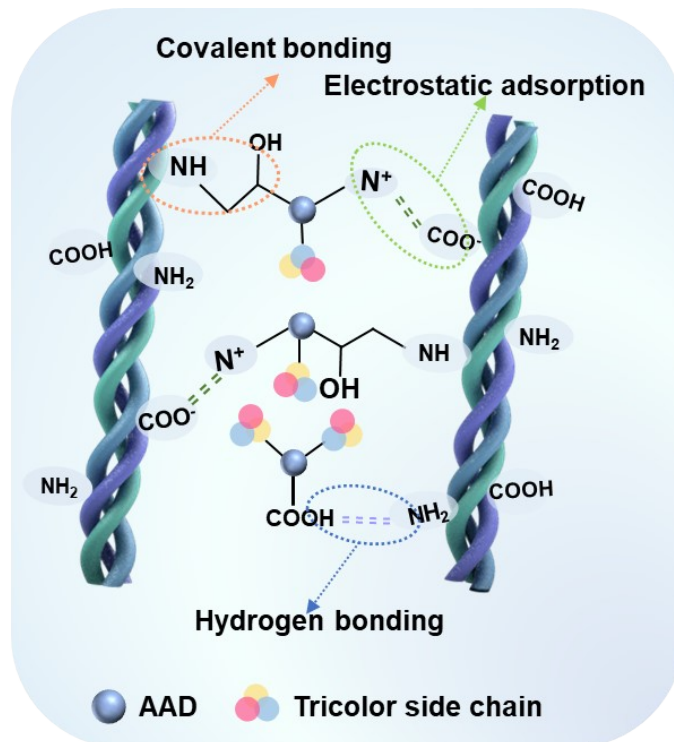

Fig. S7 Schematic diagram of AADs tanning mechanism.

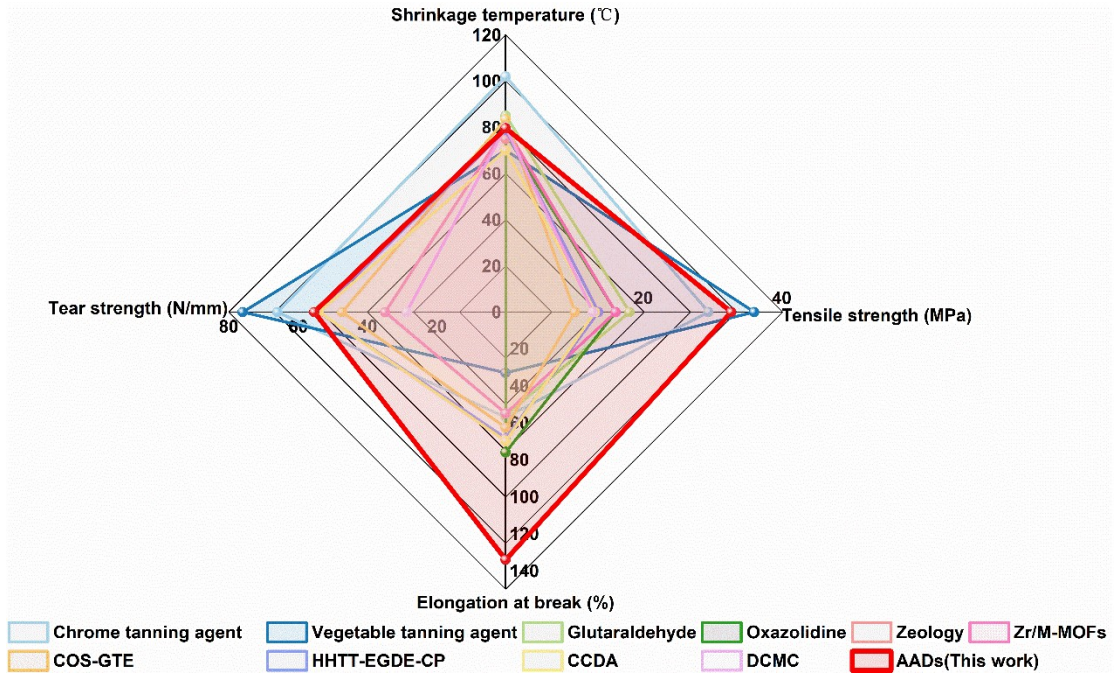

Fig. S8 Comparison of thermal stability and mechanical properties between integrated polymer treated leather and typical tanning agent tanned leather

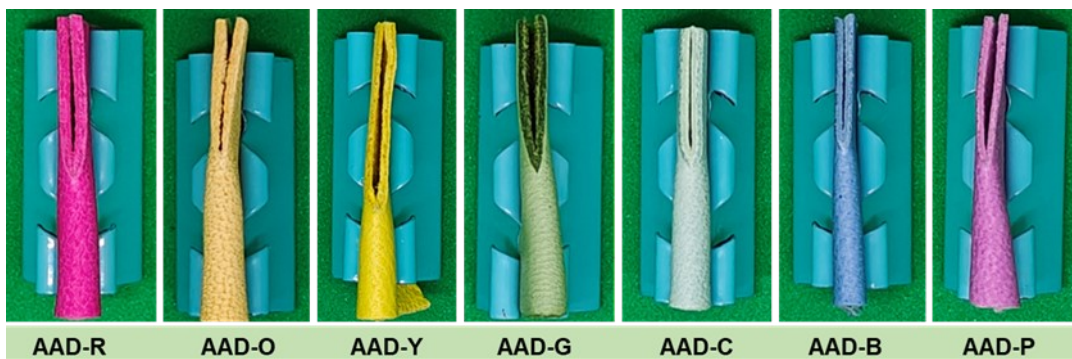

Fig. S9 Penetration of polymeric dyes AADs in leather

Tab. S6 Surface color of cotton cloth after dry and wet rubbing in AADs dyed leather.

| Samples | Dry-rubbing | Wet-rubbing |
|---------|-------------|-------------|
| AAD-R   |             |             |
| AAD-O   |             |             |



|       |                                                                                   |                                                                                     |
|-------|-----------------------------------------------------------------------------------|-------------------------------------------------------------------------------------|
| AAD-Y |  |  |
| AAD-G |  |  |
| AAD-C |  |  |
| AAD-B |  |  |
| AAD-P |  |  |

Tab. S7 Surface color of cotton cloth after dry and wet rubbing in anionic dyed leather.

| Samples | Dry-rubbing                                                                         | Wet-rubbing                                                                           |
|---------|-------------------------------------------------------------------------------------|---------------------------------------------------------------------------------------|
| TWS     | 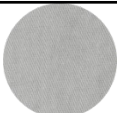 |  |
| F-90    |  |  |
| AT      |  |  |

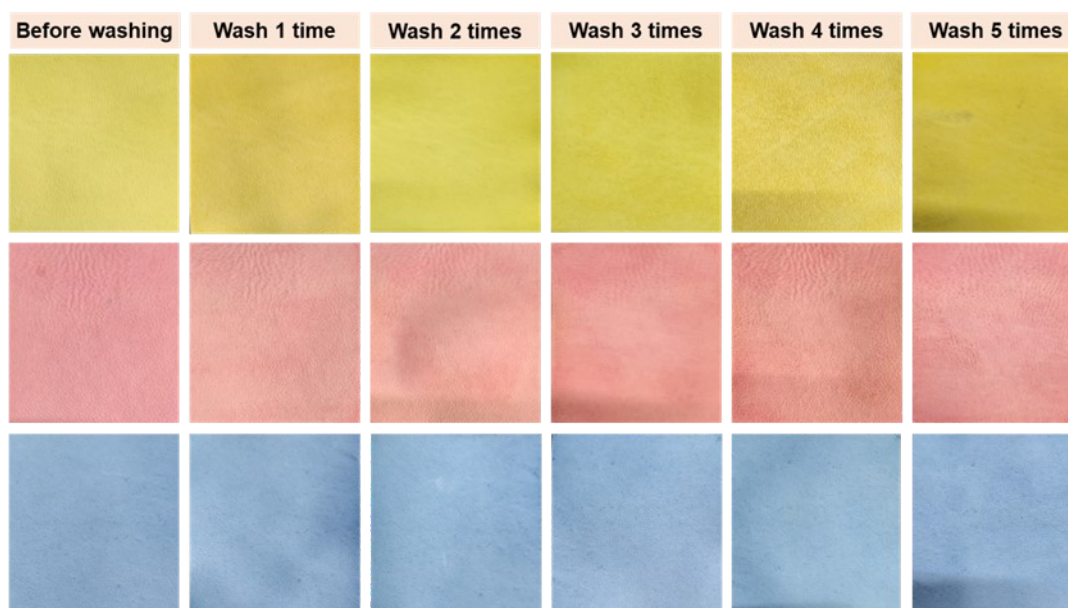

Fig. S10 Color Changes on the surface of AAD-dyed leather after 1 to 5 wash cycles.

Tab. S8 Evaluation of wash fastness ratings for AAD-dyed leather

| Samples | Wash 1 time | Wash 2 times | Wash 3 times | Wash 4 times | Wash 5 times |
|---------|-------------|--------------|--------------|--------------|--------------|
| AAD-Y   | Grade 5     | Grade 5      | Grade 5      | Grade 5      | Grade 5      |
| AAD-R   | Grade 5     | Grade 4~5    | Grade 5      | Grade 5      | Grade 4~5    |
| AAD-B   | Grade 5     | Grade 5      | Grade 5      | Grade 4~5    | Grade 5      |

Tab. S9 Chemical usage, water consumption and processing time of AADs and traditional tanning-wet finishing processes

|                                                        | Chemicals usage (%) | Water consumption (%) | Processing time (min) | Ref |
|--------------------------------------------------------|---------------------|-----------------------|-----------------------|-----|
| Zirconium-aluminium-titanium combination tanning agent | 88.9                | 1400                  | 1330                  | 3   |
| Chrome tanning agent                                   | 45.9                | 1150                  | 2360                  | 4   |
| Glutaraldehyde tanning agent                           | 42.7                | 2000                  | 1095                  | 5   |
| Polymer chrome-free tanning agent                      | 64.8                | 1330                  | 1235                  | 6   |
| Integration tanning agent (This work)                  | 22.4                | 200                   | 500                   | -   |

Tab. S10 TOC content of baths before and after tanning-wet finishing for different tanning processes.

| Samples | TOC (mg/L) |          | Absorption rate (%) |
|---------|------------|----------|---------------------|
|         | Initial    | Residual |                     |
| AAD     | 25424      | 3125     | 87.71               |
| AAD-R   | 27574      | 4055     | 85.29               |
| AAD-Y   | 29234      | 4796     | 83.59               |
| AAD-B   | 31254      | 5028     | 83.91               |
| TWS     | 54231      | 18865    | 65.21               |
| F-90    | 51259      | 24452    | 52.29               |
| AT      | 60257      | 16528    | 72.57               |

Tab. S11 BOD<sub>5</sub>, COD<sub>Cr</sub>, and BOD/COD content of baths tanning-wet finishing for different tanning processes.

| Samples | BOD <sub>5</sub> (mg/L) | COD <sub>Cr</sub> (mg/L) | BOD <sub>5</sub> /COD |
|---------|-------------------------|--------------------------|-----------------------|
| AAD     | 2058                    | 5415                     | 0.38                  |
| AAD-R   | 4190                    | 12326                    | 0.33                  |
| AAD-Y   | 2660                    | 7714                     | 0.34                  |
| AAD-B   | 2510                    | 7076                     | 0.35                  |
| TWS     | 6480                    | 23258                    | 0.28                  |
| F-90    | 7580                    | 32849                    | 0.23                  |
| AT      | 6870                    | 23404                    | 0.29                  |

Tab. S12 Characteristic Values of Various Impact Categories of AADs

| Category | Unit                                 | Depickling | Tanning  | Rewetting | Neutralizing | Retanning | Fatliquoring | Dyeing | Total    |
|----------|--------------------------------------|------------|----------|-----------|--------------|-----------|--------------|--------|----------|
| PED      | MJ                                   | 3.64E+02   | 1.53E+04 | 0         | 0            | 0         | 0            | 0      | 1.56E+04 |
| ADP      | kg Sb eq.                            | 5.90E-04   | 5.38E-03 | 0         | 0            | 0         | 0            | 0      | 5.97E-03 |
| WU       | kg                                   | 1.14E+01   | 5.80E+02 | 0         | 0            | 0         | 0            | 0      | 5.92E+02 |
| GWP      | kg CO <sub>2</sub> eq.               | 2.70E+01   | 8.55E+02 | 0         | 0            | 0         | 0            | 0      | 8.82E+02 |
| AP       | kg SO <sub>2</sub> eq.               | 1.47E-01   | 4.43E+00 | 0         | 0            | 0         | 0            | 0      | 4.58E+00 |
| EP       | kg PO <sub>4</sub> <sup>3-</sup> eq. | 5.54E-02   | 1.74E+00 | 0         | 0            | 0         | 0            | 0      | 1.80E+00 |
| ET       | CTUe                                 | 2.25E+02   | 1.23E+04 | 0         | 0            | 0         | 0            | 0      | 1.25E+04 |
| HTC      | CTUh                                 | 2.39E-08   | 4.58E-07 | 0         | 0            | 0         | 0            | 0      | 4.82E-07 |
| HTNC     | CTUh                                 | 7.09E-07   | 1.28E-05 | 0         | 0            | 0         | 0            | 0      | 1.35E-05 |

Tab. S13 Characteristic Values of Various Impact Categories of SACG

| Category | Unit                                 | Depickling | Tanning  | Rewetting | Neutralizing | Retanning | Fatliquoring | Dyeing   | Total    |
|----------|--------------------------------------|------------|----------|-----------|--------------|-----------|--------------|----------|----------|
| PED      | MJ                                   | 3.35E+02   | 1.66E+04 | 0.00E+00  | 1.13E+03     | 2.50E+03  | 3.71E+03     | 4.69E+03 | 2.90E+04 |
| ADP      | kg Sb eq.                            | 6.52E-05   | 5.32E-03 | 0.00E+00  | 4.96E-04     | 1.04E-03  | 1.55E-03     | 1.78E-03 | 1.03E-02 |
| WU       | kg                                   | 1.80E+01   | 4.73E+02 | 0.00E+00  | 3.91E+01     | 1.22E+02  | 2.02E+02     | 2.12E+02 | 1.07E+03 |
| GWP      | kg CO <sub>2</sub> eq.               | 1.97E+01   | 7.70E+02 | 0.00E+00  | 7.97E+01     | 1.32E+02  | 1.41E+02     | 2.82E+02 | 1.43E+03 |
| AP       | kg SO <sub>2</sub> eq.               | 8.02E-02   | 3.71E+00 | 0.00E+00  | 3.96E-01     | 5.60E-01  | 1.50E+00     | 1.36E+00 | 7.61E+00 |
| EP       | kg PO <sub>4</sub> <sup>3-</sup> eq. | 5.46E-02   | 1.19E+00 | 0.00E+00  | 1.92E-01     | 3.28E-01  | 1.20E+00     | 5.03E-01 | 3.47E+00 |
| ET       | CTUe                                 | 2.43E+02   | 1.65E+04 | 0.00E+00  | 9.54E+02     | 5.05E+02  | 3.75E+03     | 4.95E+03 | 2.69E+04 |
| HTC      | CTUh                                 | 1.95E-08   | 5.96E-07 | 0.00E+00  | 3.14E-08     | 1.41E-06  | 1.25E-07     | 1.10E-07 | 2.29E-06 |
| HTNC     | CTUh                                 | 2.58E-07   | 1.42E-05 | 0.00E+00  | 1.04E-06     | 1.51E-06  | 1.00E-05     | 3.33E-06 | 3.03E-05 |

Tab. S14 Characteristic Values of Various Impact Categories of EHBP

| Category | Unit                                 | Depickling | Tanning  | Rewetting | Neutralizing | Retanning | Fatliquoring | Dyeing   | Total    |
|----------|--------------------------------------|------------|----------|-----------|--------------|-----------|--------------|----------|----------|
| PED      | MJ                                   | 4.82E+02   | 1.81E+04 | 1.39E+03  | 1.13E+03     | 2.49E+03  | 9.32E+03     | 4.38E+03 | 3.73E+04 |
| ADP      | kg Sb eq.                            | 8.38E-04   | 8.62E-03 | 2.84E-04  | 4.96E-04     | 1.04E-03  | 4.33E-03     | 1.74E-03 | 1.73E-02 |
| WU       | kg                                   | 1.59E+01   | 5.25E+02 | 8.55E+01  | 3.91E+01     | 1.22E+02  | 5.66E+02     | 1.91E+02 | 1.55E+03 |
| GWP      | kg CO <sub>2</sub> eq.               | 3.51E+01   | 9.70E+02 | 7.03E+01  | 7.97E+01     | 1.31E+02  | 3.02E+02     | 2.63E+02 | 1.85E+03 |
| AP       | kg SO <sub>2</sub> eq.               | 1.94E-01   | 6.93E+00 | 2.63E-01  | 3.96E-01     | 5.57E-01  | 3.89E+00     | 1.29E+00 | 1.35E+01 |
| EP       | kg PO <sub>4</sub> <sup>3-</sup> eq. | 7.52E-02   | 2.66E+00 | 2.38E-01  | 1.92E-01     | 3.27E-01  | 3.33E+00     | 4.82E-01 | 7.31E+00 |

|      |      |          |          |          |          |          |          |          |          |
|------|------|----------|----------|----------|----------|----------|----------|----------|----------|
| ET   | CTUe | 3.10E+02 | 1.30E+04 | 1.13E+03 | 9.54E+02 | 5.02E+02 | 1.04E+04 | 4.88E+03 | 3.12E+04 |
| HTC  | CTUh | 3.21E-08 | 7.75E-07 | 7.91E-08 | 3.14E-08 | 1.41E-06 | 3.27E-07 | 1.04E-07 | 2.76E-06 |
| HTNC | CTUh | 9.63E-07 | 1.15E-05 | 8.30E-07 | 1.04E-06 | 1.51E-06 | 2.76E-05 | 3.19E-06 | 4.67E-05 |

---

## References

- 1 L. Yu, X. Qiang, L. Cui, B. Chen, X. Wang and X. Wu, *J. Clean. Prod.*, 2020, **270**, 122351.
- 2 X. Liu, Y. Wang, X. Wang and H. Jiang, *Green Chem.*, 2021, **23**, 5924–5935.
- 3 Y. Wang, *West Leather*, 2022, **44**, 29–35.
- 4 X. Ding and Z. Shan, *Leather and Chemicals*, 2019, **36**, 8–19.
- 5 W. Ding, Y. Wang, J. Zhou, J. Li and B. Shi, *China Leather*, 2018, **47**, 20–30.
- 6 Q. Zhu, *Beijing Leather*, 2019, **12**, 30–35.
